# Supplementary material for: Anti-Atopic Properties of Gracillin Isolated from Dioscorea quinqueloba on 2,4-Dinitrochlorobenzene-Induced Skin Lesions in Mice
Source: PubMed Central journal article supplement (PMC6164938; doi:10.3390/nu10091205), 2018-09-01

## SUPPLEMENTARY DATA

### Anti-Atopic Properties of Gracillin Isolated from *Dioscorea quinqueloba* on 2,4-Dinitrochlorobenzene-Induced Skin Lesions in Mice

Jonghwan Jegal<sup>1,†</sup>, No-June Park<sup>2,†</sup>, Beom-Geun Jo<sup>1</sup>, Sim-Kyu Bong<sup>2</sup>, Hyun Jegal<sup>2</sup>, Min Hye Yang<sup>1,\*</sup> and Su-Nam Kim<sup>2,\*</sup>

#### Affiliation

<sup>1</sup> College of Pharmacy, Pusan National University, Busan 46241, South Korea; jhjegal@pusan.ac.kr (J.J.); dtc98103@pusan.ac.kr (B.-G.J.)

<sup>2</sup> Natural Products Research Institute, Korea Institute of Science and Technology, Gangneung 25451, South Korea; 115519@kist.re.kr (N.-J.P.); 115044@kist.re.kr (S.-K.B.); 116524@kist.re.kr (H.J.)

\* Correspondence: mhyang@pusan.ac.kr (M.H.Y.); snkim@kist.re.kr (S.-N.K.);

Tel.: +82-51-510-2811 (M.H.Y.); +82-33-650-3503 (S.-N.K.);

Fax: +82-51-513-6754 (M.H.Y.); +82-33-650-3419 (S.-N.K.)

#### Supporting Information Contents:

**Figure S1.** The <sup>1</sup>H NMR spectrum of gracillin (400 MHz, Py-*d*<sub>5</sub>).

**Figure S2.** The <sup>13</sup>C NMR spectrum of gracillin (150 MHz, Py-*d*<sub>5</sub>).

Figure S1. The  $^1\text{H}$  NMR spectrum of gracillin.

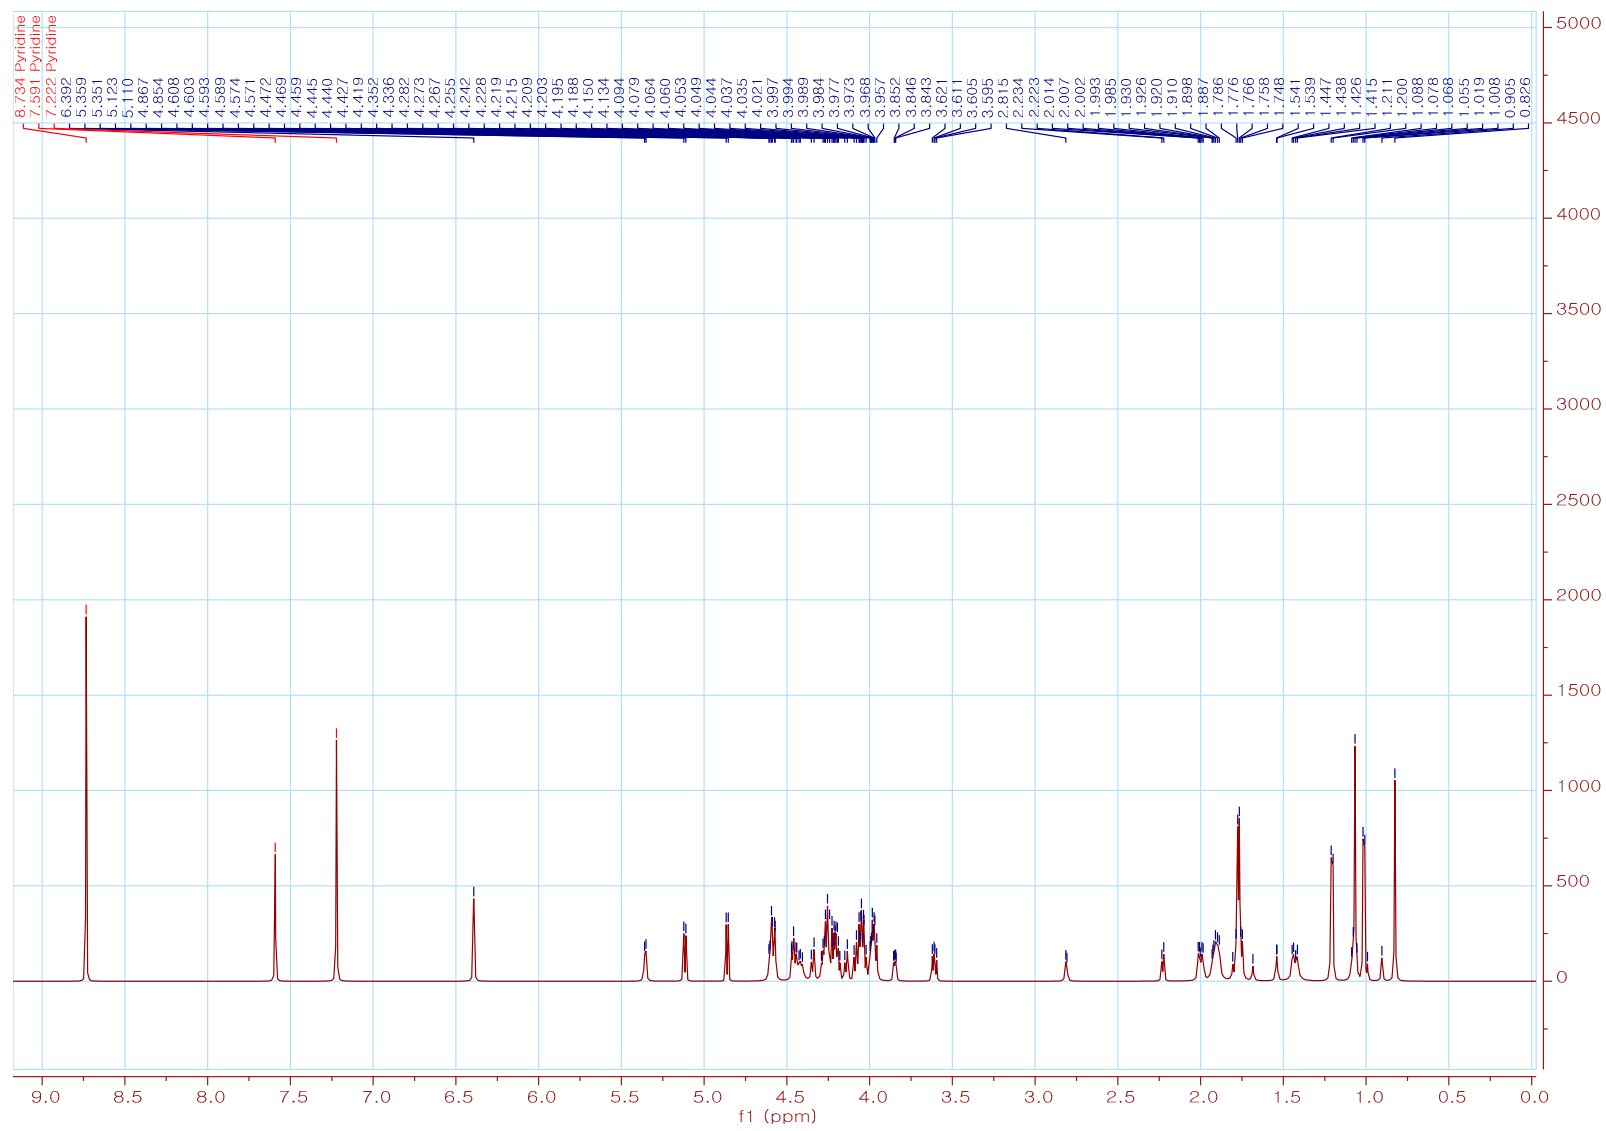

Figure S2. The  $^{13}\text{C}$  NMR spectrum of gracillin.

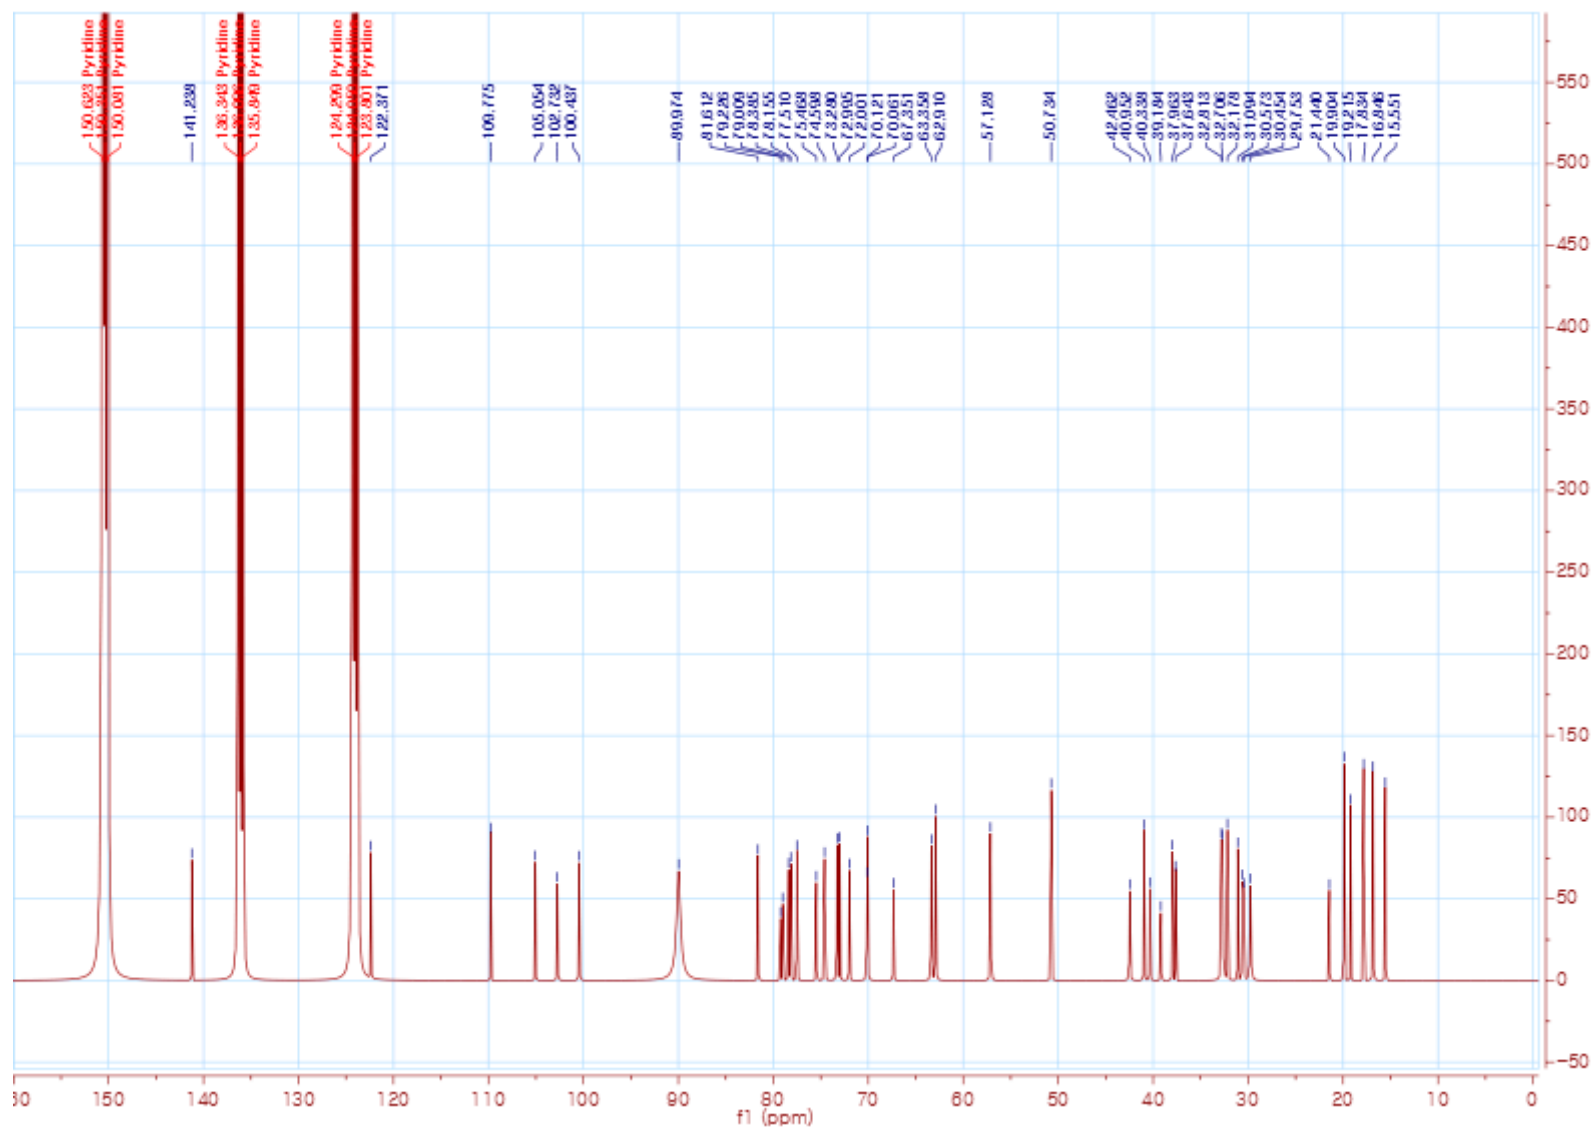

Supplement: nutrients-10-01205-s001.pdf [file nutrients-10-01205-s001.pdf]
